# Supplementary material for: A microwave synthesized CuxS and graphene oxide nanoribbon composite as a highly efficient counter electrode for quantum dot sensitized solar cells
Source: Royal Society of Chemistry journal article supplement (doi:10.1039/c6nr01161f), 2016-01-01
Supplement: c6nr01161f1.pdf [file c6nr01161f1.pdf]

### **Supporting Information**

#### **Microwave Synthesized Cu<sub>x</sub>S and Graphene Oxide Nanoribbon Composite as Highly Efficient Counter Electrode for Quantum Dot Sensitized Solar Cells**

Dibyendu Ghosh, Ganga Halder, Atharva Sahasrabudhe and Sayan Bhattacharyya\*

*Department of Chemical Sciences, Indian Institute of Science Education and Research (IISER) Kolkata, Mohanpur - 741246, India*

\*Email for correspondence: sayanb@iiserkol.ac.in

## S1. EDAX Spectra and Elemental Mapping of $\text{Cu}_x\text{S}$ Nanostructures

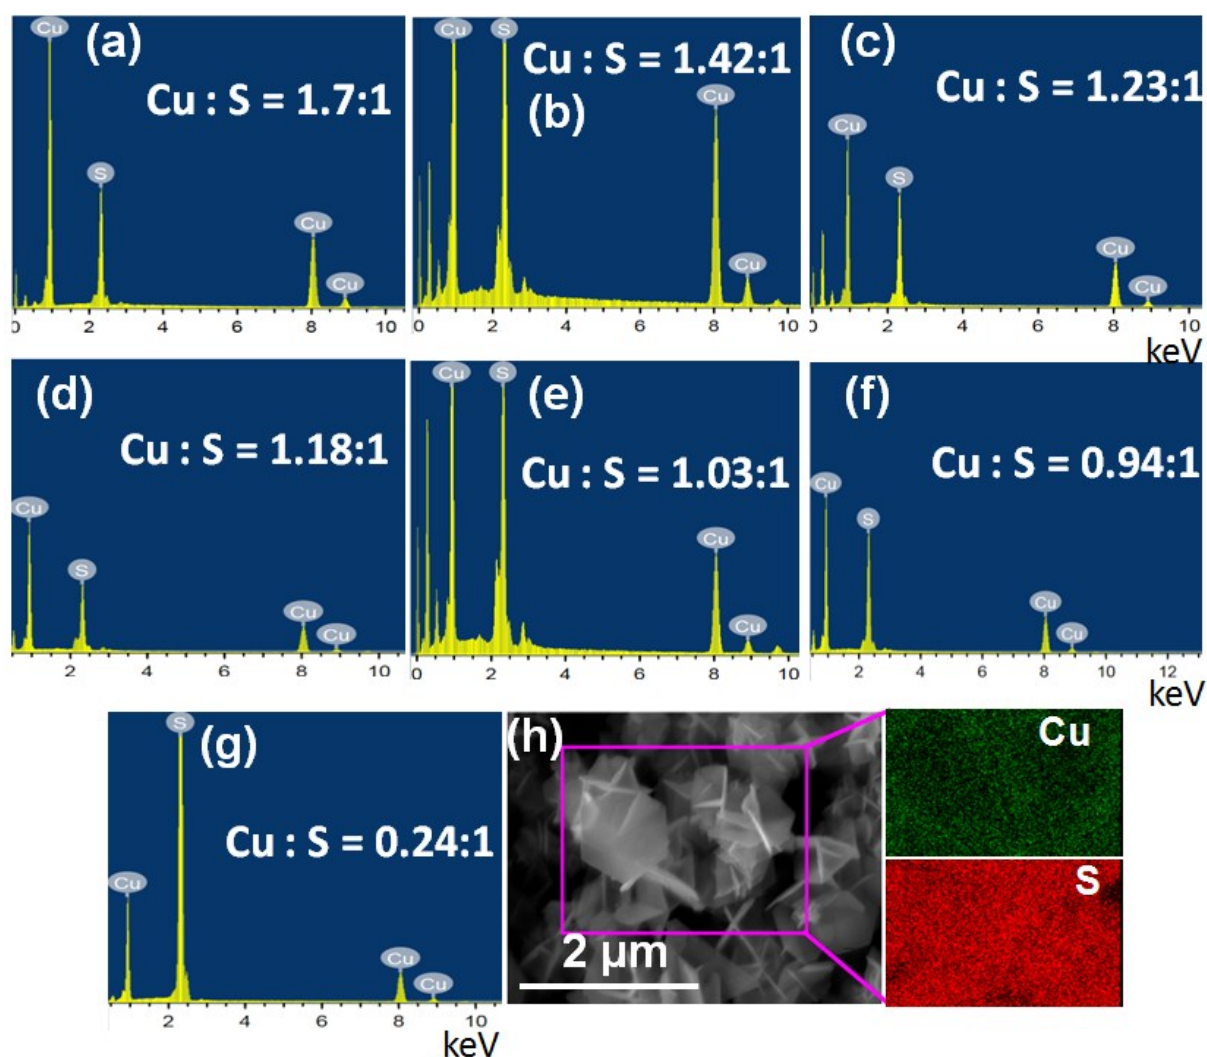

**Fig. S1** EDAX spectra of  $\text{Cu}_x\text{S}$  for different Cu/S ratios, (a) 1.7, (b) 1.42, (c) 1.23, (d) 1.18, (e) 1.03, (f) 0.94 and (g) 0.24. (h) EDAX mapping of a representative  $\text{Cu}_x\text{S}$  with Cu/S ratio of 1.03.

## S2. FESEM Images of $\text{Cu}_x\text{S}$ Nanostructures

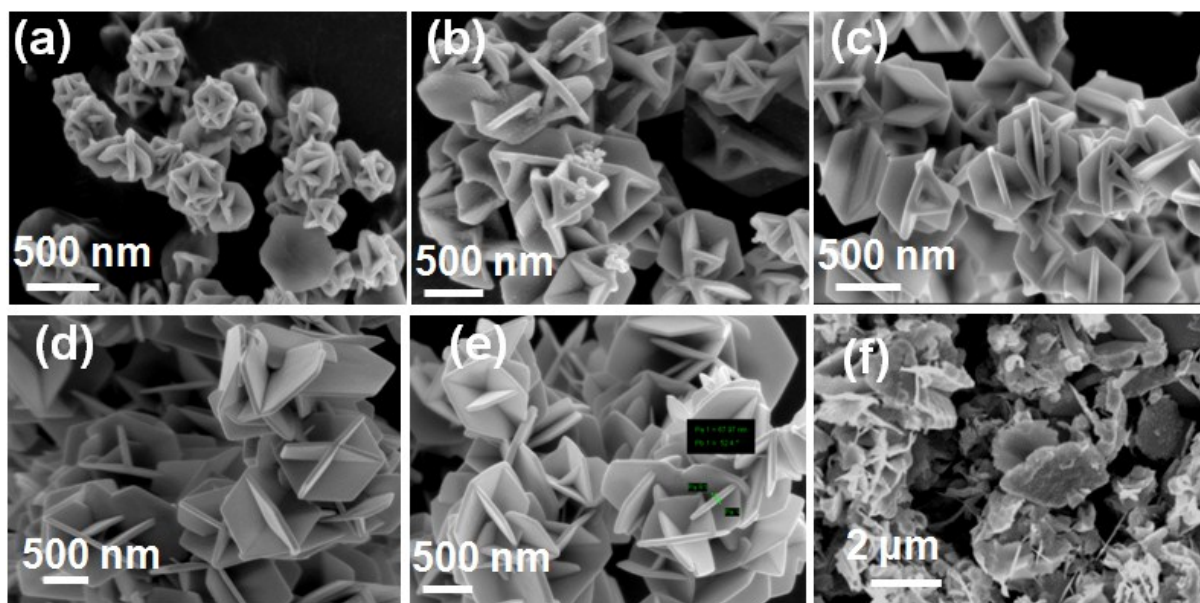

**Fig. S2** FESEM micrograph of  $\text{Cu}_x\text{S}$  for  $x$  values of (a) 1.7, (b) 1.42, (c) 1.23, (d) 1.03, (e) 0.94 and (f) 0.24.

### S3. FTIR Spectra of CNT, GOR and GO

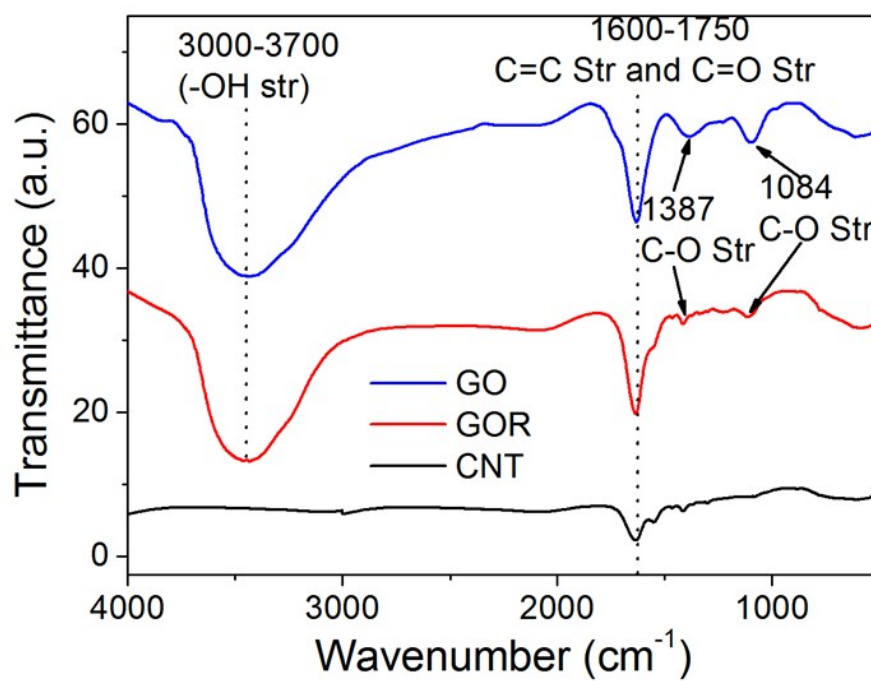

**Fig. S3** FTIR spectra of CNT, GOR and GO.

#### S4. Band Gap Estimation of GOR

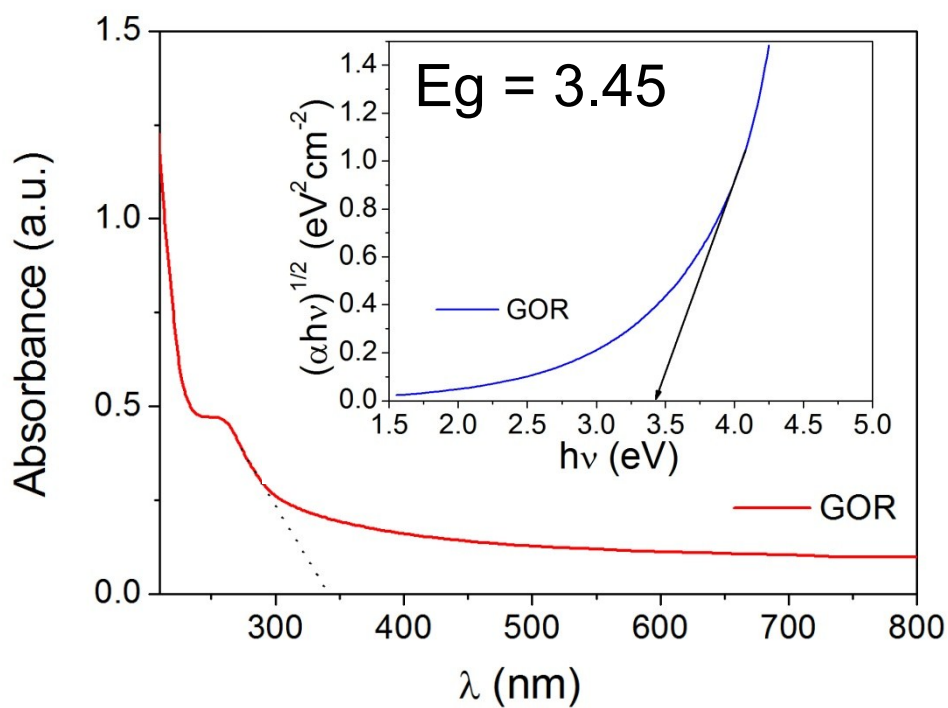

**Fig. S4** Absorption spectrum of GOR. (Inset) Corresponding Tauc plot.

The UV-vis absorption spectrum shows the absorption peak at  $\sim 260$  nm and the optical band gap calculated from absorption onset is  $\sim 3.45$  eV which also matches well with the Tauc plot.

### S5. $\text{Cu}_x\text{S}$ Films Deposited on FTO Glass

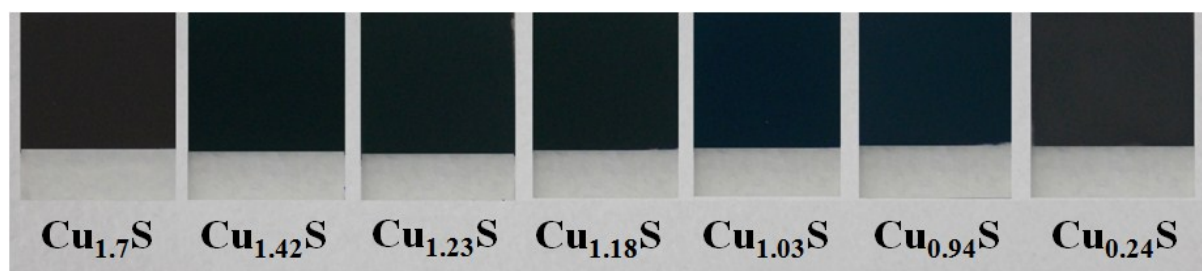

**Fig. S5** Digital photographs of the  $\text{Cu}_x\text{S}$  films deposited on FTO glass.

# **S6. Structural Characterization of $\text{Cu}_{1.18}\text{S-CNT}$ , $\text{Cu}_{1.18}\text{S-GO}$ and $\text{Cu}_{1.18}\text{S-GOR}$**

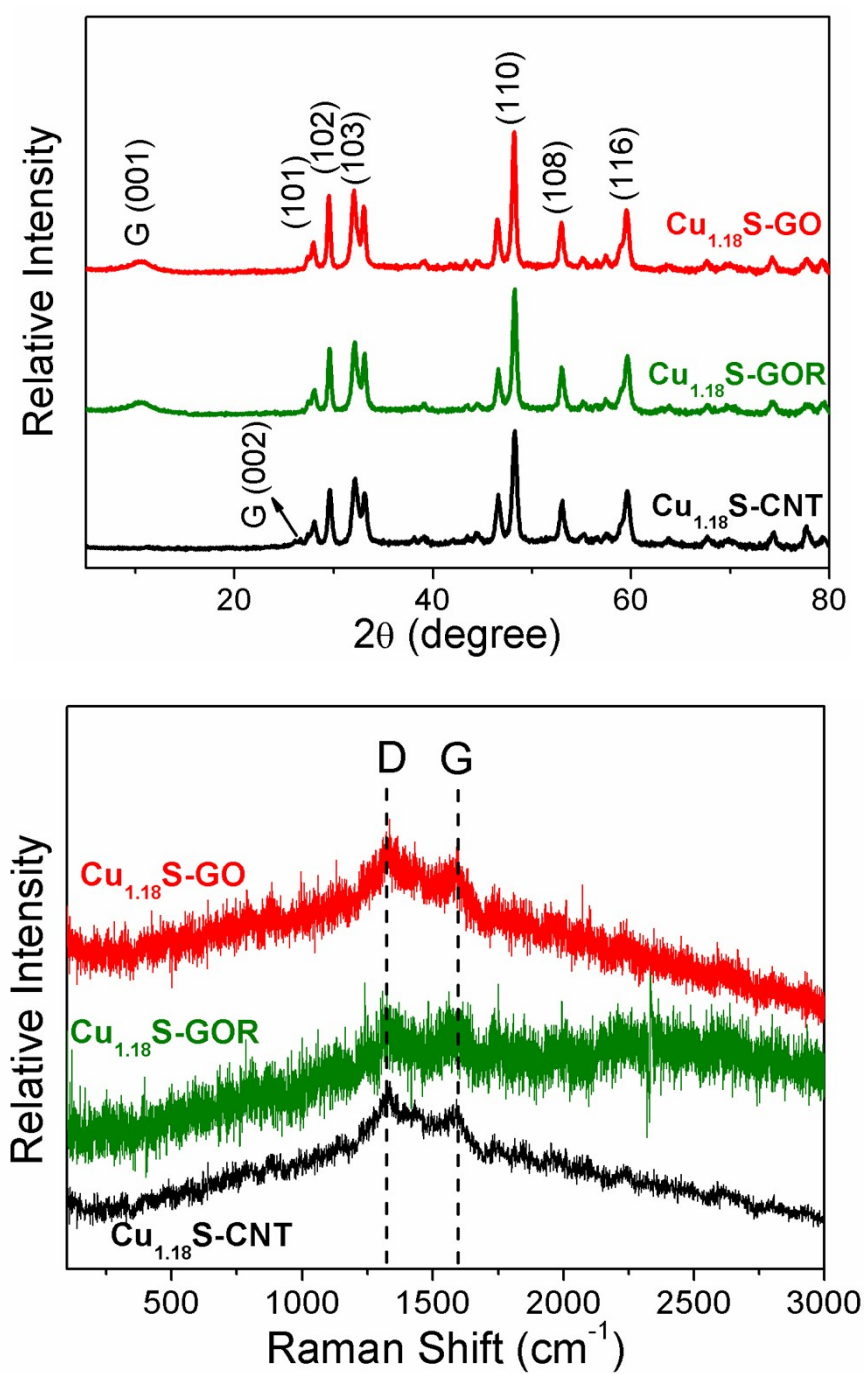

**Fig. S6** (Top panel) XRD patterns and (bottom panel) Raman spectra of  $\text{Cu}_{1.18}\text{S-CNT}$ ,  $\text{Cu}_{1.18}\text{S-GO}$  and  $\text{Cu}_{1.18}\text{S-GOR}$  composites.

**Table S7:** The catalytic parameters of the CEs: Pt, Cu<sub>1.18</sub>S composite with 15 wt% CNT, GOR and GO.

| Samples                  | J <sub>reduction</sub><br>(mA/cm <sup>2</sup> ) | Area under<br>CV curve | ECSA (cm <sup>2</sup> /mg) |
|--------------------------|-------------------------------------------------|------------------------|----------------------------|
| Cu <sub>1.18</sub> S-CNT | -9.75                                           | 4.41                   | 420.2                      |
| Cu <sub>1.18</sub> S-GOR | -25.35                                          | 6.04                   | 575.2                      |
| Cu <sub>1.18</sub> S-GO  | -21.12                                          | 5.65                   | 538.0                      |
| Pt                       | -0.124                                          | 2.74                   | 264.7                      |



## S8. Band Gap Estimation of GO

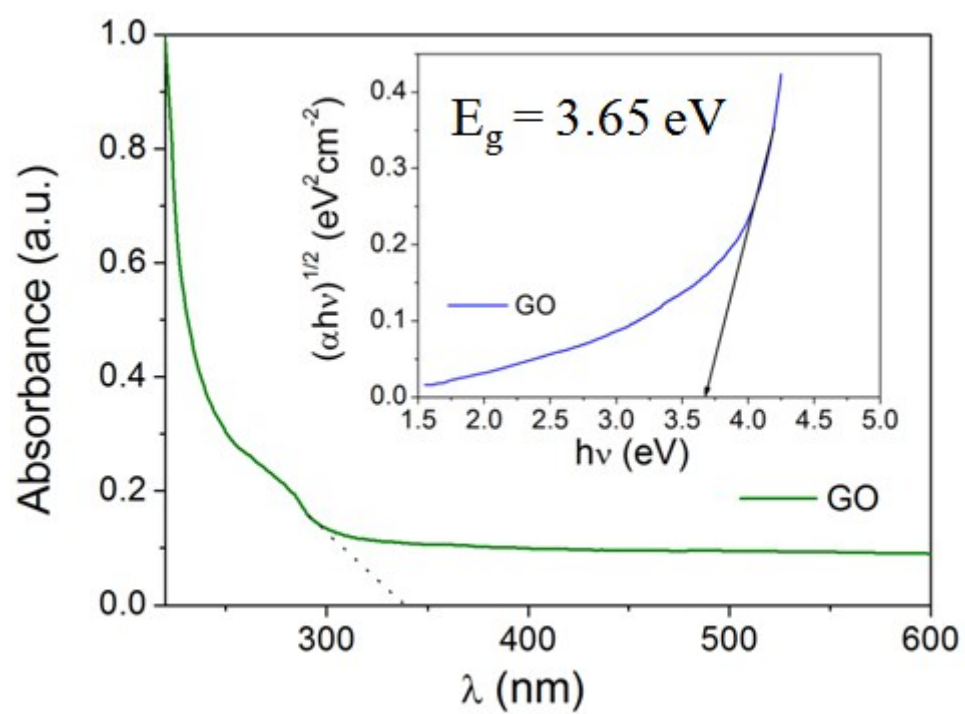

**Fig. S8** Absorption spectrum of GO. (Inset) Corresponding Tauc plot.

### S9. Open Circuit Voltage ( $V_{oc}$ ) Decay Profiles

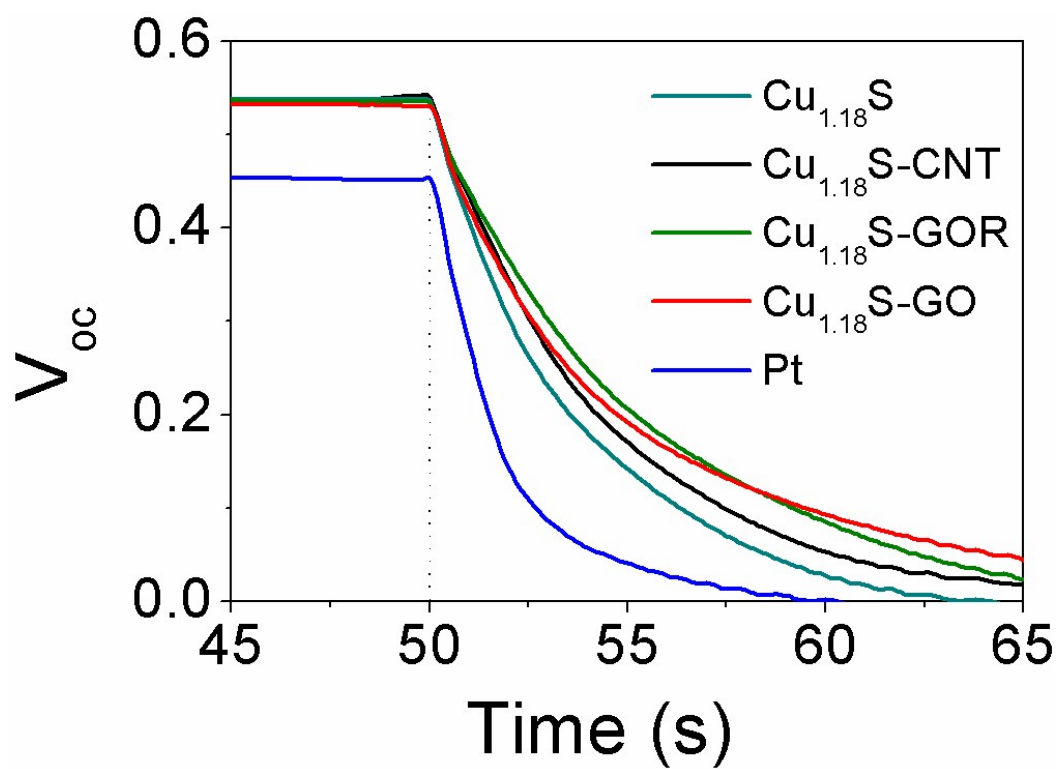

**Fig. S9**  $V_{oc}$  decay with the CEs: Pt,  $\text{Cu}_{1.18}\text{S}$  and its composites with 15 wt% of CNT, GOR and GO.
